# Supplementary material for: Characterization of gut-homing molecules in non-endstage livers of patients with primary sclerosing cholangitis and inflammatory bowel disease
Source: PubMed Central journal article supplement (PMC7388383; doi:10.1016/j.jtauto.2020.100054), 2020-04-09
Supplement: mmc1.pdf [file mmc1.pdf]

## Supplementary material

### Characterization of gut-homing molecules in non-endstage livers of patients with Primary Sclerosing Cholangitis and Inflammatory Bowel Disease

Manon de Krijger<sup>a,b</sup>, Thijmen Visseren<sup>c,e</sup>, Manon E. Wildenberg<sup>a,b</sup>, Gerrit K.J. Hooijer<sup>d</sup>, Monique M.A. Verstegen<sup>e</sup>, Luc J.W. van der Laan<sup>e</sup>, Wouter J. de Jonge<sup>a</sup>, Joanne Verheij<sup>d</sup>, Cyriel Y. Ponsioen<sup>b\*</sup>

<sup>a</sup> Tytgat Institute for Liver and Intestinal Research, Amsterdam UMC, University of Amsterdam, Meibergdreef 69, 1105 BK, Amsterdam, The Netherlands

<sup>b</sup> Department of Gastroenterology and Hepatology, Amsterdam UMC, University of Amsterdam, Meibergdreef 9, 1105 AZ Amsterdam, The Netherlands

<sup>c</sup> Department of Gastroenterology and Hepatology, Erasmus MC-University Medical Center Rotterdam, Doctor Molewaterplein 40, 3015 GD, Rotterdam, The Netherlands

<sup>d</sup> Department of Pathology, Amsterdam UMC, University of Amsterdam, Meibergdreef 9, 1105 AZ, Amsterdam, The Netherlands

<sup>e</sup> Department of Surgery, Erasmus MC-University Medical Center Rotterdam, Doctor Molewaterplein 40, 3015 GD, Rotterdam, The Netherlands

**Supplementary table 1 – Overview of used liver tissue and colonic tissue**

**1a. Used liver tissue**

| Group    | Type                  | IBD type       | Condition | Technique | Target                             |          |
|----------|-----------------------|----------------|-----------|-----------|------------------------------------|----------|
| PSC-IBD  | PSC-IBD <sub>ST</sub> | 20/20 UC       | FFPE      | IHC       | VAP-1, CD103, E-cadherin, CXCL12   |          |
|          |                       |                |           | ISH       | <i>ITGB7, CCL28</i>                |          |
|          | PSC-IBD <sub>LT</sub> | 5/8 UC, 3/8 CD | FFPE      | IHC       | VAP-1, CD103, E-cadherin, CXCL12   |          |
|          |                       |                |           | ISH       | <i>ITGB7, CCL28, CCL25</i>         |          |
|          |                       |                |           | Frozen    | IHC                                | MAdCAM-1 |
|          |                       |                |           | qPCR      | MAdCAM-1, CCL28, CCL25, CK7        |          |
| Controls | Control               | n.a.           | FFPE      | IHC       | VAP-1, CD103, E-cadherin, CXCL12   |          |
|          |                       |                |           | ISH       | <i>ITGB7, CCL28, CCL25</i>         |          |
|          |                       |                | Frozen    | IHC       | MAdCAM-1                           |          |
|          |                       |                |           | qPCR      | <i>MAdCAM-1, CCL28, CCL25, CK7</i> |          |
|          | PBC                   | n.a.           | FFPE      | IHC       | CD103, E-cadherin, CXCL12          |          |
|          |                       |                |           | ISH       | <i>ITGB7, CCL28</i>                |          |
|          | HCV                   | n.a.           | FFPE      | ISH       | <i>ITGB7</i>                       |          |

PSC, Primary Sclerosing Cholangitis; IBD, Inflammatory Bowel Disease; ST, short-term; LT, long-term; UC, Ulcerative Colitis; CD, Crohn's disease; PBC, Primary Biliary Cholangitis; HCV, Hepatitis C Virus; FFPE, Formalin-Fixed Paraffin Embedded; IHC, Immunohistochemistry; ISH, In Situ Hybridization

**1b. Used colonic tissue**

| Group | Type    | IBD type | Condition | Technique | Target                              |
|-------|---------|----------|-----------|-----------|-------------------------------------|
|       | PSC-IBD | 18/18 UC | FFPE      | IHC       | MAdCAM-1, CD103, E-cadherin, CXCL12 |
|       |         |          | Frozen    | PCR Array |                                     |
|       | IBD     | 11/11 UC | FFPE      | IHC       | MAdCAM-1, CD103, E-cadherin, CXCL12 |
|       |         |          | Frozen    | PCR Array |                                     |

PSC, Primary Sclerosing Cholangitis; IBD, Inflammatory Bowel Disease; UC, Ulcerative Colitis; FFPE, Formalin-Fixed Paraffin Embedded; IHC

**Supplementary table 2** - Patient characteristics of PSC-IBD and IBD patients from which intestinal tissue was used

|                                             | PSC-IBD<br>(n=18) | IBD<br>(n=11) | P-value |
|---------------------------------------------|-------------------|---------------|---------|
| Male [n (%)]                                | 14 (78)           | 6 (55)        | 0.0237  |
| Age (years) [median (IQR)]                  | 45 (30-57)        | 45 (35-57)    | 0.808   |
| Small duct PSC [n (%)]                      | 4 (22)            | -             | -       |
| IBD type [n (%)]                            |                   |               | -       |
| Ulcerative Colitis                          | 18 (100)          | 11 (100)      |         |
| Age at PSC diagnosis (years) [median (IQR)] | 32 (26-44)        | -             | -       |
| Age at IBD diagnosis (years) [median (IQR)] | 27 (21-40)        | 29 (21-44)    | 0.611   |
| Disease duration PSC (years) [median (IQR)] | 10 (3-16)         | -             | -       |
| Disease duration IBD (years) [median (IQR)] | 14 (7-27)         | 15 (6-19)     | 0.947   |
| Montreal Classification [n (%)]             |                   |               | 0.528   |
| E1                                          | 1 (6)             | 1 (9)         |         |
| E2                                          | 2 (11)            | 3 (27)        |         |
| E3                                          | 15 (83)           | 7 (64)        |         |
| Endoscopic inflammation [n (%)]             | 2 (11)            | 2 (18)        | 0.622   |
| Medication use [n (%)]                      |                   |               |         |
| 5-ASA use                                   | 15 (83)           | 8 (73)        | 0.646   |
| Ursodeoxycholic acid                        | 16 (90)           | 0 (0)         | <0.001  |
| Steroids                                    | 2 (11)            | 1 (9)         | 1.000   |
| Anti-TNF $\alpha$                           | 1 (6)             | 0 (0)         | 1.000   |
| Thiopurines                                 | 5 (28)            | 5 (46)        | 0.432   |

PSC, Primary Sclerosing Cholangitis; IBD, Inflammatory Bowel Disease; IQR, Interquartile range. P-values were calculated using Fisher's Exact Test for categorical variables and Mann-Whitney U statistic for numerical variables.

**Supplementary table 3 – Primer sequences**

| <b>Gene</b>                     | <b>Forward sequence</b> | <b>Reverse sequence</b> |
|---------------------------------|-------------------------|-------------------------|
| <i>MAdCAM-1</i>                 | QT00017367 (Qiagen)     |                         |
| <i>VAP-1</i>                    | CAGCAGCGTTTTCAATCAGA    | TGCAGAAAACCAGCTGTAC     |
| <i>CCL28</i>                    | AATGCAGCAGAGAGGACTCG    | TGACAGCAGCCAAGTCACAA    |
| <i>CK7</i>                      | ACATCGAGATCGCCACCTAC    | GATATTCACGGCTCCCACTC    |
| <i>CCL25</i>                    | CAAAGCTCCACCACAACACG    | ATGGAGCCCAGAAATGAGCC    |
| <i><math>\beta</math>-Actin</i> | AGAGCTACGAGCTGCCTGAC    | AGCACTGTGTTGGCGTACAG    |
| <i>B2M</i>                      | CTCGCGCTACTCTCTCTTTCT   | TGCTCCACTTTTTCAATTCTCT  |

# Supplementary Figure 1

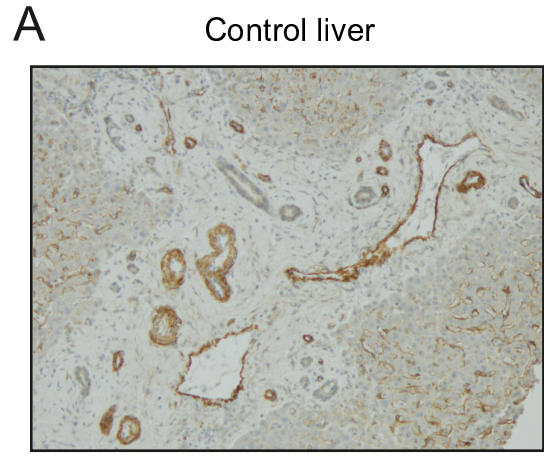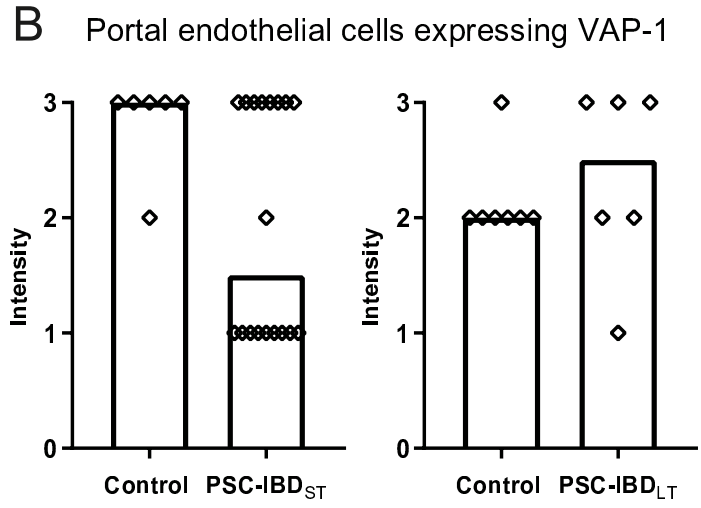

A: Representative picture of immunohistochemistry of vascular adhesion protein-1 (VAP-1) on FFPE liver sections, 10x magnification, control liver. B: Staining intensity (0-3) of VAP-1 on control liver (n=6) and short-term PSC-IBD (PSC-IBD<sub>ST</sub>) liver (n=18) (left) and control liver (n=7) and long-term PSC-IBD (PSC-IBD<sub>LT</sub>) liver (n=6) (right). Statistical testing was performed using the Mann-Whitney U test, data presented as median. A p-value <0.05 was considered statistically significant.

# Supplementary Figure 2

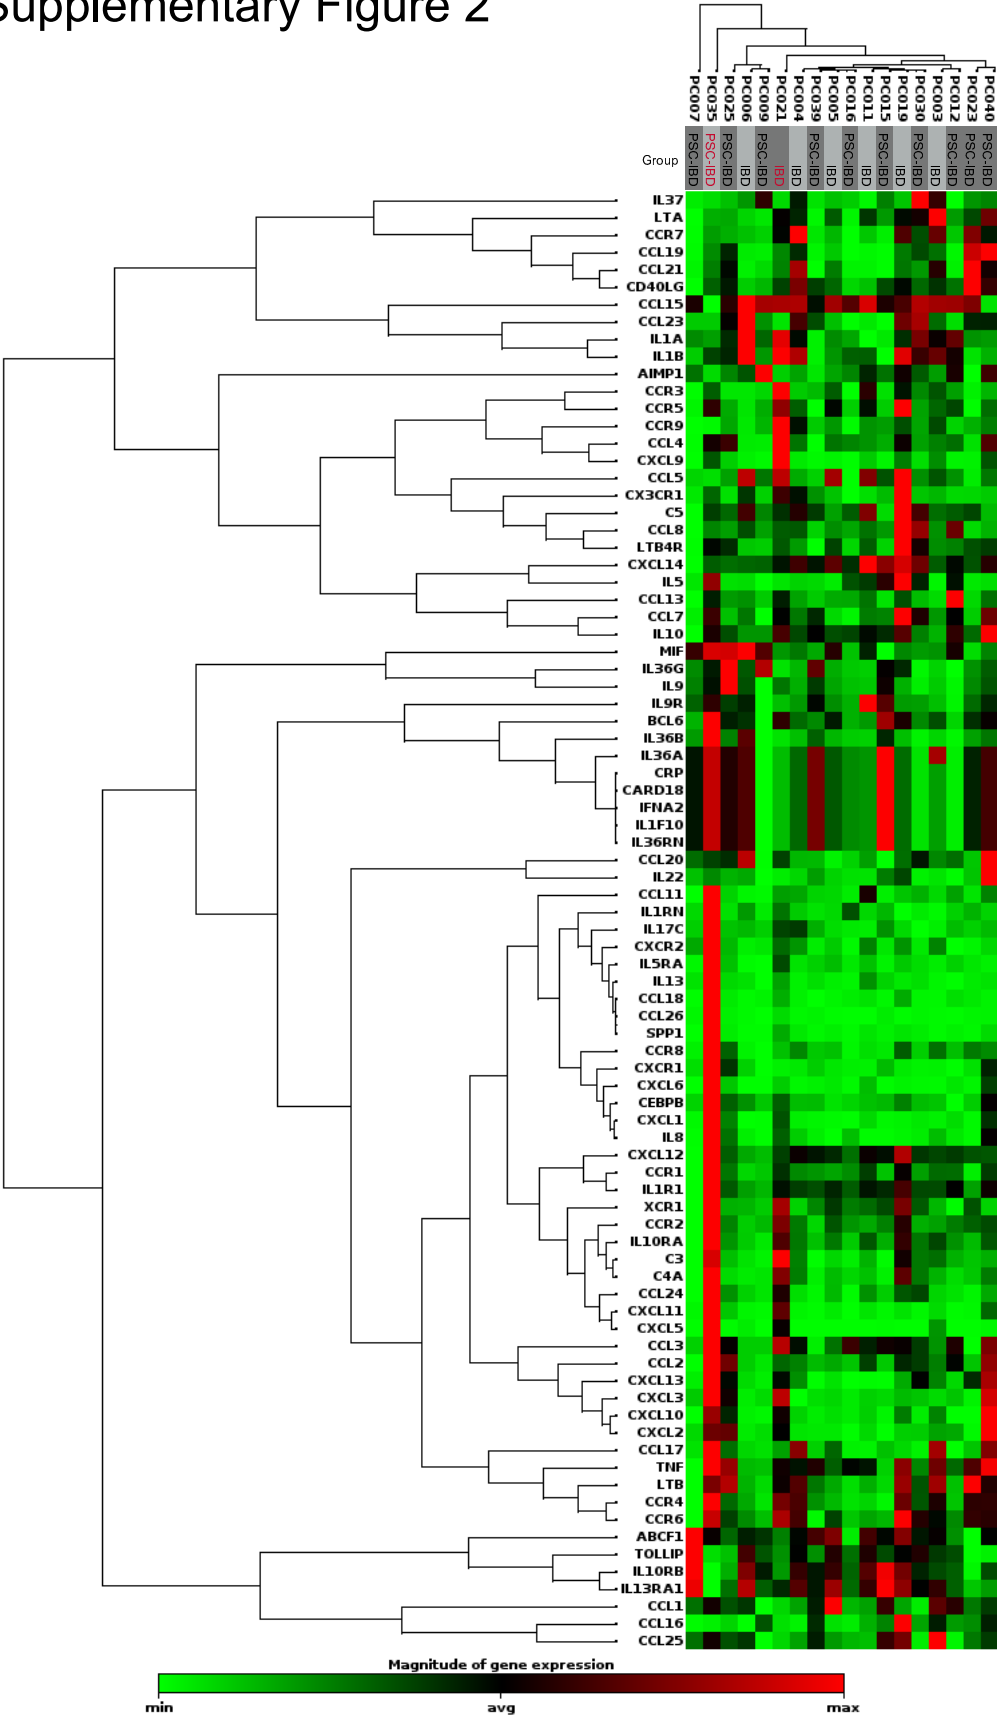

Heat map of gene expression profile of 96 genes encoding for inflammatory cytokines and receptors in colonic biopsies of patients with PSC-IBD (n=11) and IBD (n=7). Samples with endoscopic signs of inflammation are depicted in red.

# Supplementary Figure 3

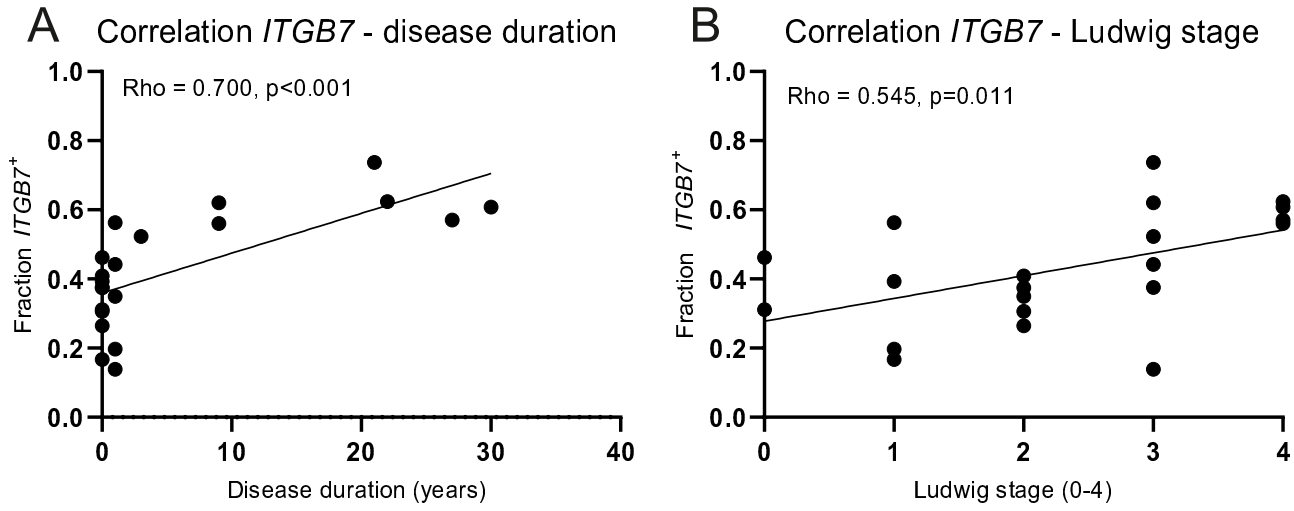

A: Correlation between disease duration in years (PSC-IBD<sub>ST</sub> and PSC-IBD<sub>LT</sub> combined) and fraction of CD3<sup>+</sup> T-cells that show mRNA expression of *ITGB7*. B: Correlation between Ludwig stage (PSC-IBD<sub>ST</sub> and PSC-IBD<sub>LT</sub> combined) and fraction of CD3<sup>+</sup> T-cells that show mRNA expression of *ITGB7*. Correlation was tested using Spearman's Rho, a p-value < 0.05 was considered statistically significant.
